# Supplementary material for: Continuous and discontinuous water release/intake of (BEDO-TTF)2Br(H2O)3micro-crystals embedded in polymer film
Source: Royal Society of Chemistry journal article supplement (doi:10.1039/c0jm02274h), 2010-12-22
Supplement: c0jm02274h.pdf [file c0jm02274h.pdf]

Supplementary Information  
Continuous and Discontinuous water release/intake of  $(\text{BEDO-TTF})_2\text{Br}(\text{H}_2\text{O})_3$  micro  
crystals embedded in polymer film  
by Tsuyoshi Haneda, Adam Tracz, Gunzi Saito and Hideki Yamochi

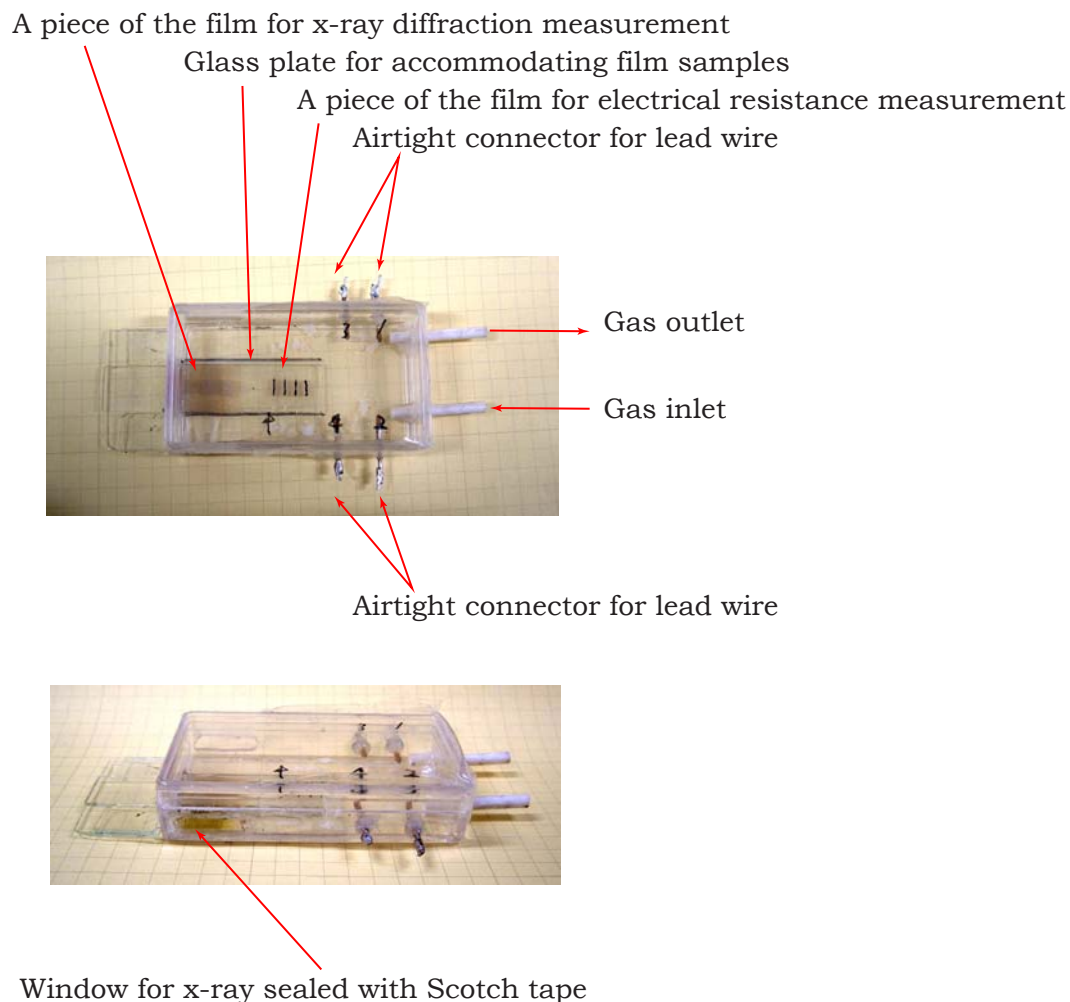

Figure S1. The photo of the plastic box for simultaneous measurements of electrical resistance and x-ray diffraction. For the background, a section paper with squares per  $5 \times 5 \text{ mm}^2$  pattern is used.

Table S1. Surface resistance of the film normalized by the initial value ( $R/R_0$ ) and x-ray diffraction angle of embedded micro crystals (XRD  $2\theta$ ) at the relative humidity (RH) of 16.5 - 65.0 %.

| data # <sup>a</sup> | RH (%) | $R/R_0$ | XRD $2\theta$ /° | T/°C <sup>b</sup> |
|---------------------|--------|---------|------------------|-------------------|
| 1                   | 24.2   | 1.00    | 5.238            | 23.6              |
| 2                   | 16.5   | 1.00    | 5.242            | 23.8              |
| 3                   | 27.0   | 1.01    | 5.237            | 24.5              |
| 4                   | 46.4   | 1.02    | 5.233            | 24.3              |
| 5                   | 63.8   | 1.02    | 5.231            | 24.3              |
| 6                   | 44.7   | 1.01    | 5.235            | 24.4              |
| 7                   | 26.2   | 1.01    | 5.239            | 24.4              |
| 8                   | 16.0   | 1.00    | 5.246            | 24.3              |
| 9                   | 34.4   | 1.01    | 5.237            | 24.3              |
| 10                  | 65.0   | 1.02    | 5.232            | 24.3              |
| 11                  | 35.2   | 1.01    | 5.237            | 24.0              |
| 12                  | 16.7   | 1.00    | 5.246            | 24.0              |
| 13                  | 62.5   | 1.02    | 5.233            | 24.1              |
| 14                  | 63.7   | 1.02    | 5.233            | 24.0              |
| 15                  | 25.3   | 1.01    | 5.241            | 24.2              |
| 16                  | 23.6   | 1.01    | 5.241            | 24.5              |

a) Data numbers are given according to the measurement sequence. b) Flow gas temperature for each measurement.

Table S2. Surface resistance of the film normalized by the initial value ( $R/R_0$ ) and x-ray diffraction angle of embedded micro crystals ( $2\theta$ ) at the relative humidity (RH) of 1.9 - 33.7 %.

| data # <sup>a</sup> | RH (%) | $R/R_0$ | XRD $2\theta$ /° <sup>b</sup> |            |              |            | T/°C <sup>c</sup> |
|---------------------|--------|---------|-------------------------------|------------|--------------|------------|-------------------|
|                     |        |         | $2\theta$ /°                  | (int. (%)) | $2\theta$ /° | (int. (%)) |                   |
| 1                   | 33.7   | 1.00    | 5.247                         |            |              |            | 23.7              |
| 2                   | 20.1   | 0.99    | 5.252                         |            |              |            | 23.8              |
| 3                   | 17.1   | 0.99    | 5.255                         |            |              |            | 23.7              |
| 4                   | 15.6   | 0.99    | 5.257                         |            |              |            | 23.6              |
| 5                   | 12.8   | 0.99    | 5.260                         |            |              |            | 24.4              |
| 6                   | 18.4   | 1.00    | 5.255                         |            |              |            | 24.6              |
| 7                   | 9.8    | 0.99    | 5.265                         |            |              |            | 24.7              |
| 8                   | 7.1    | 1.01    | 5.271                         | (97.6)     | 5.410        | (2.4)      | 24.4              |
| 9                   | 12.8   | 1.00    | 5.262                         |            |              |            | 24.1              |
| 10                  | 9.7    | 1.00    | 5.266                         |            |              |            | 23.7              |
| 11                  | 6.9    | 1.03    | 5.273                         | (85.0)     | 5.445        | (15.0)     | 23.6              |
| 12                  | 6.9    | 1.04    | 5.274                         | (82.0)     | 5.450        | (18.0)     | 23.8              |
| 13                  | 7.4    | 1.04    | 5.273                         | (84.3)     | 5.450        | (15.7)     | 23.8              |
| 14                  | 6.2    | 1.05    | 5.277                         | (60.0)     | 5.466        | (40.0)     | 23.7              |
| 15                  | 5.4    | 1.12    | 5.289                         | (58.1)     | 5.480        | (41.9)     | 23.6              |
| 16                  | 3.6    | 1.38    |                               |            | 5.484        |            | 23.6              |
| 17                  | 3.5    | 1.63    |                               |            | 5.489        |            | 23.9              |
| 18                  | 7.2    | 1.25    | 5.292                         | (56.5)     | 5.473        | (43.5)     | 24.0              |
| 19                  | 7.0    | 1.23    | 5.293                         | (57.3)     | 5.475        | (42.7)     | 24.1              |
| 20                  | 4.5    | 1.37    |                               |            | 5.478        |            | 24.1              |
| 21                  | 3.0    | 1.53    |                               |            | 5.504        |            | 24.0              |
| 22                  | 1.9    | 1.77    |                               |            | 5.547        |            | 23.8              |
| 23                  | 7.9    | 1.49    | 5.355                         | (64.7)     | 5.474        | (35.3)     | 23.8              |
| 24                  | 8.6    | 1.34    | 5.298                         | (57.2)     | 5.466        | (42.8)     | 23.9              |
| 25                  | 17.5   | 1.17    | 5.266                         |            |              |            | 24.2              |
| 26                  | 11.7   | 1.13    | 5.272                         |            |              |            | 24.6              |
| 27                  | 26.9   | 1.14    | 5.260                         |            |              |            | 24.8              |
| 28                  | 28.5   | 1.14    | 5.259                         |            |              |            | 24.4              |

a) Data numbers are given according to the measurement sequence. b) The relative ratio of the area intensities is given when double-peak feature was observed. c) Flow gas temperature for each measurement.
